# Supplementary material
Source: PubMed Central journal article supplement (PMC10692926)
Supplement: jcsm.10740.sm001.pdf [file jcsm.10740.sm001.pdf]

Figure S1—Forest plot showing the effect of the effect of CPAP vs control on arrhythmia.

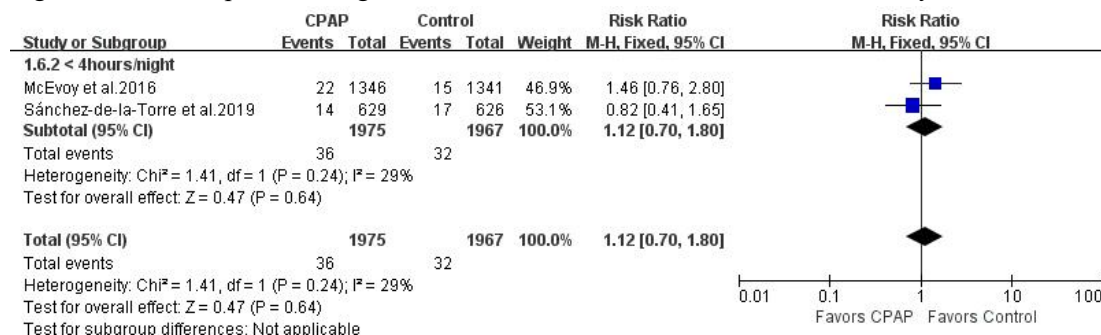

CI = confidence interval, CPAP = continuous positive airway pressure, M-H = Mantel-Haenszel.

Figure S2—Forest plot showing the effect of the effect of CPAP vs control on SBP.

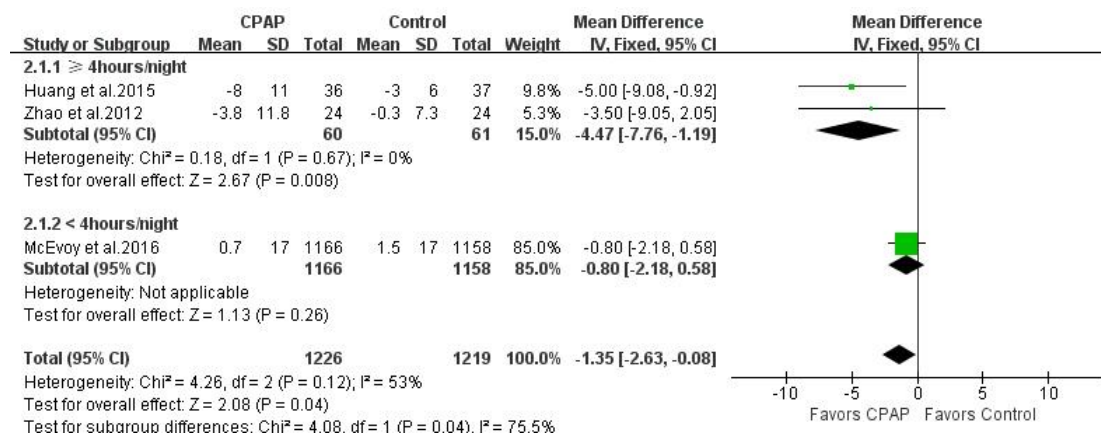

CI = confidence interval, CPAP = continuous positive airway pressure, SBP = systolic blood pressure, IV = inverse variance.

Figure S3—Forest plot showing the effect of the effect of CPAP vs control on DBP.

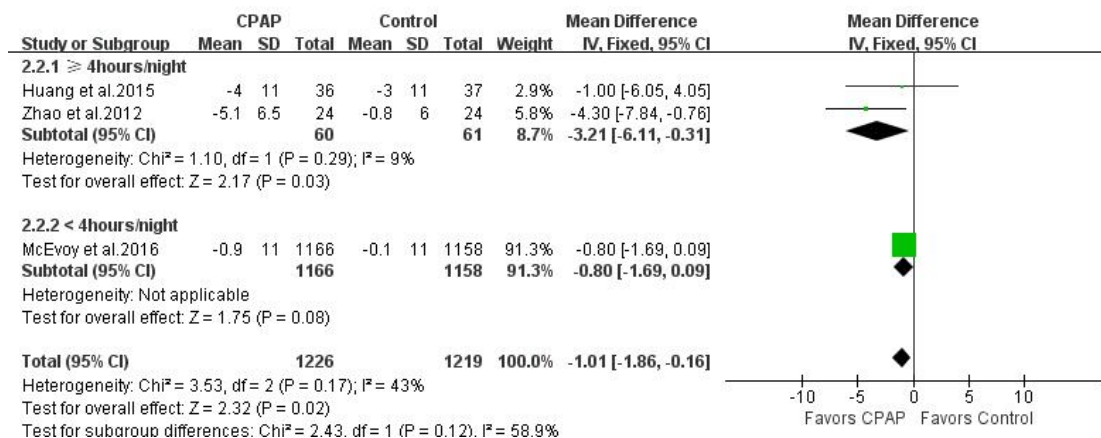

CI = confidence interval, CPAP = continuous positive airway pressure, DBP = diastolic blood pressure, IV = inverse variance.
